# Supplementary material for: Loading the FeNiOOH cocatalyst on Pt-modified hematite nanostructures for efficient solar water oxidation
Source: Royal Society of Chemistry journal article supplement (doi:10.1039/c6cp01482h), 2016-01-01
Supplement: c6cp01482h1.pdf [file c6cp01482h1.pdf]

## Supporting information

### Loading FeNiOOH Cocatalyst on Pt-modified Hematite Nanostructures for Efficient Solar Water Oxidation

*Jiujun Deng, Xiaoxin Lv, Hui Zhang, Binhua Zhao, Xuhui Sun, and Jun Zhong\**

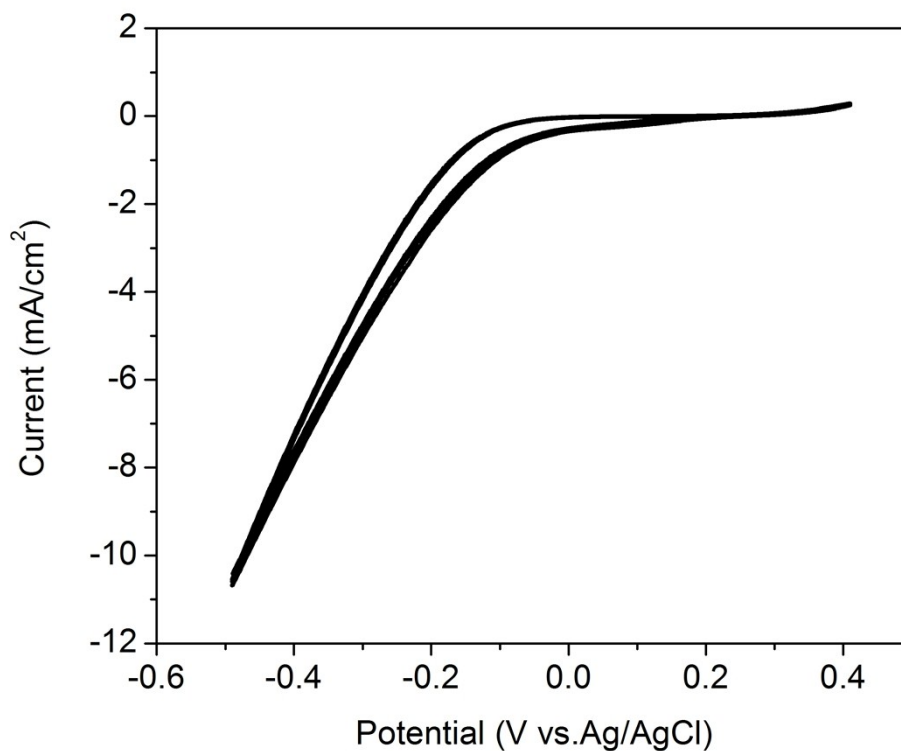

**Fig. S1:** Cyclic-voltammetry (CV) curves for the electrodeposition of FeNiOOH on hematite nanostructures.

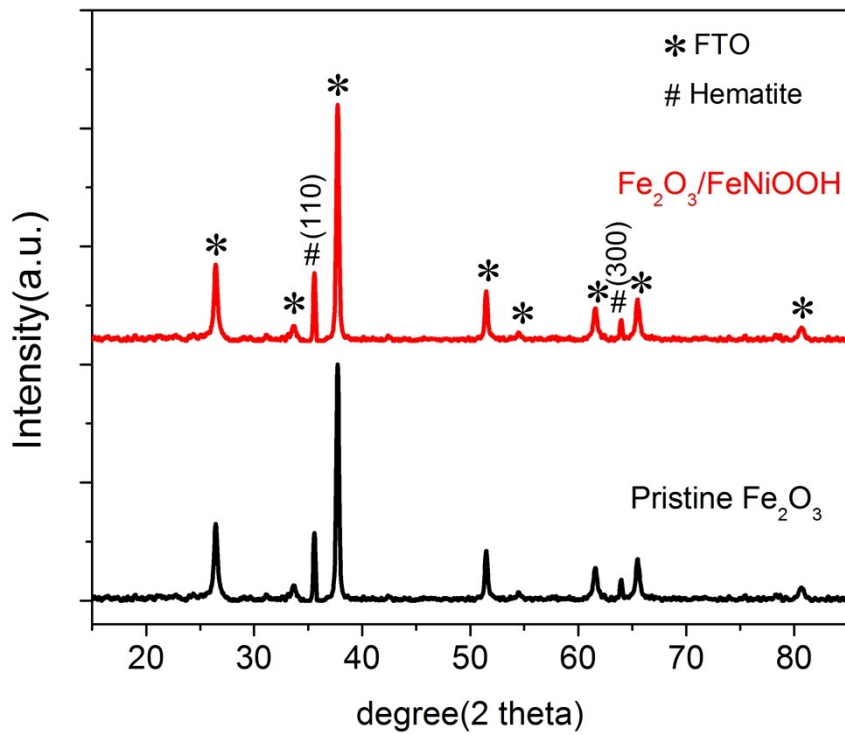

**Fig. S2:** XRD spectra of the pristine and FeNiOOH-decorated hematite nanostructures.

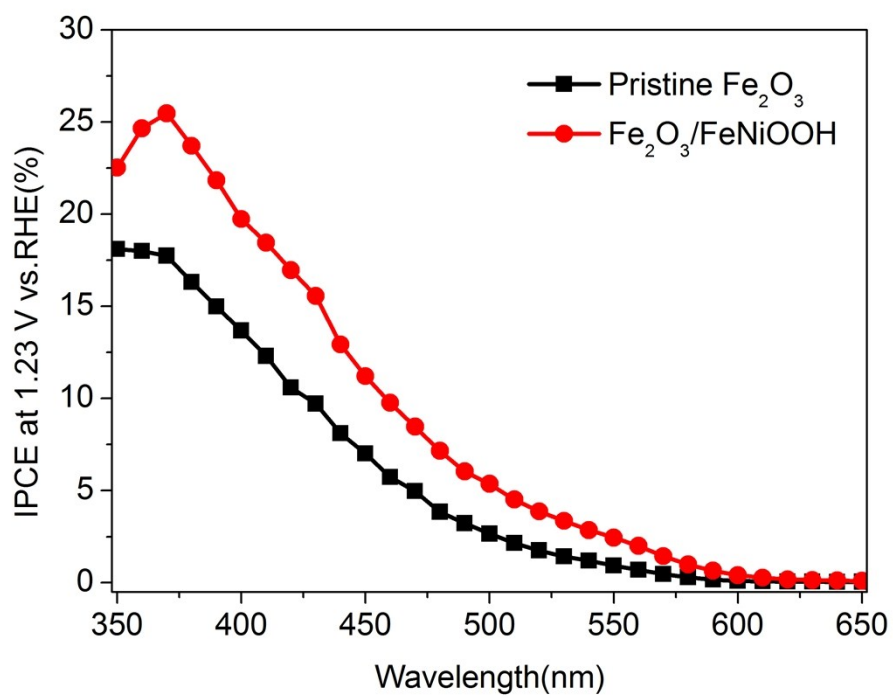

**Fig. S3:** IPCE curves of the pristine and FeNiOOH-decorated hematite photoanodes.

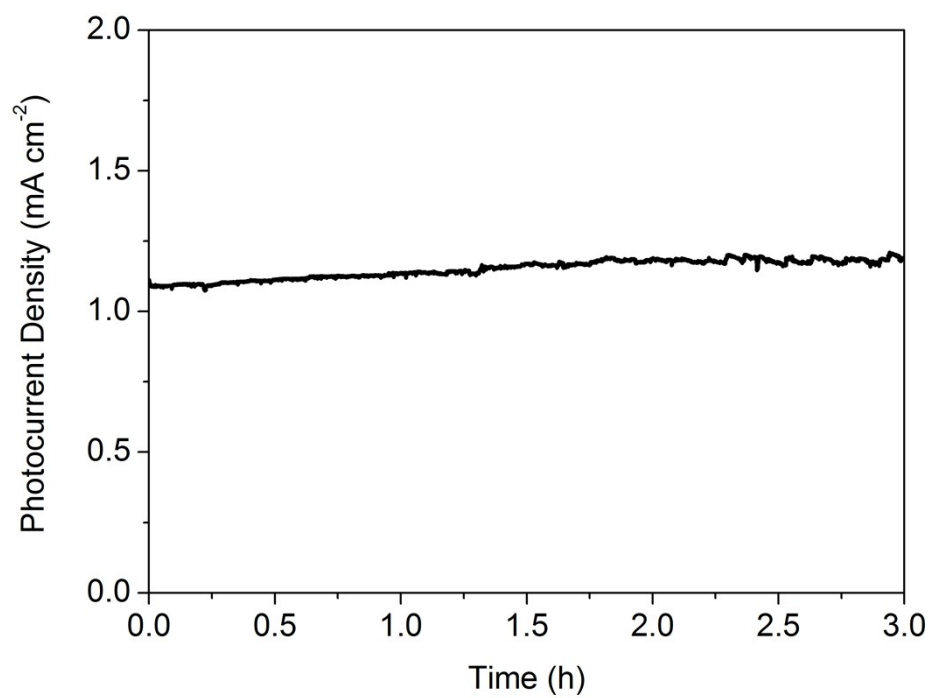

**Fig. S4:** Photochemical stability curve of the FeNiOOH-decorated hematite photoanode collected at 1.23 V *vs.* RHE.

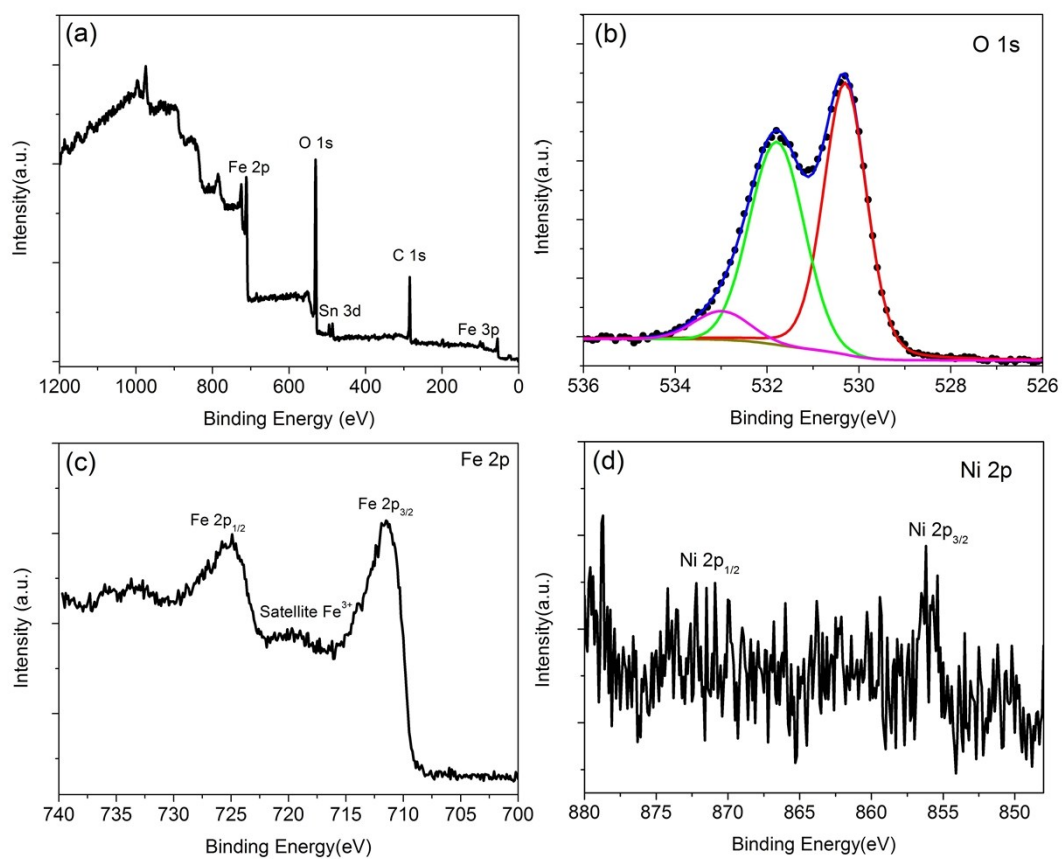

**Fig. S5:** (a) XPS survey spectrum of the FeNiOOH-decorated hematite photoanode. High-resolution O 1s (b), Fe 2p (c), and Ni 2p (d) XPS spectra of the FeNiOOH-decorated hematite photoanode.

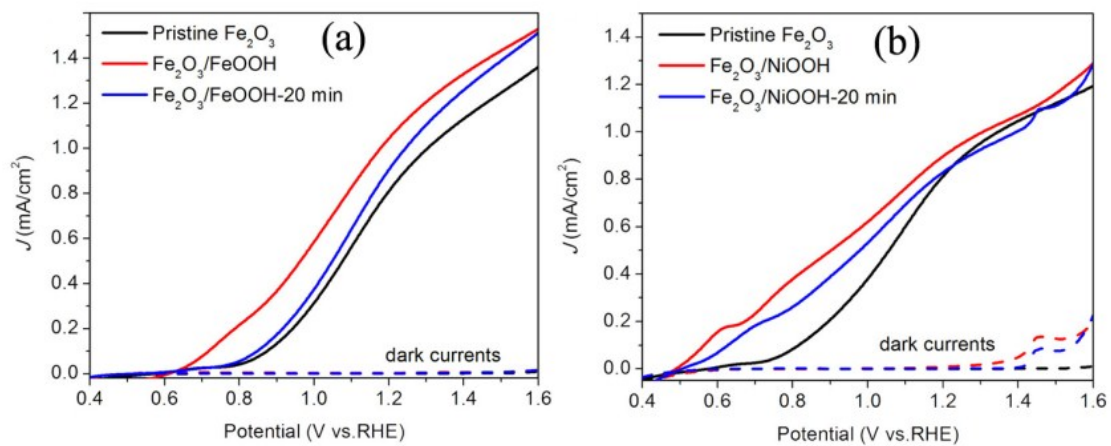

**Fig. S6:** (a)  $J$ - $V$  curves of the pristine and FeOOH-decorated hematite photoanodes.

(b)  $J$ - $V$  curves of the pristine and NiOOH-decorated hematite photoanodes.

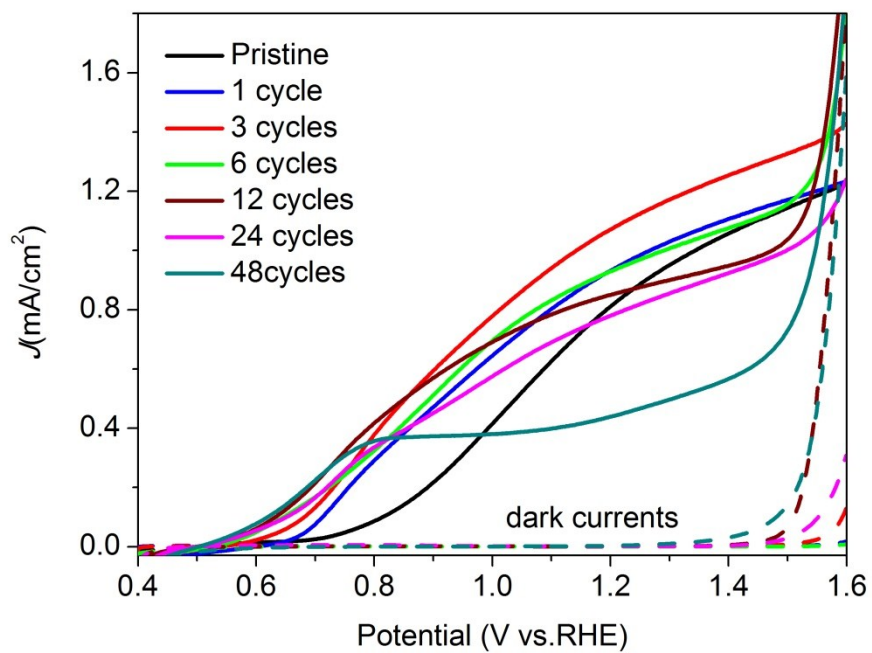

**Fig. S7:**  $J$ - $V$  curves of the pristine and FeNiOOH-decorated hematite photoanodes with various deposition cycles.

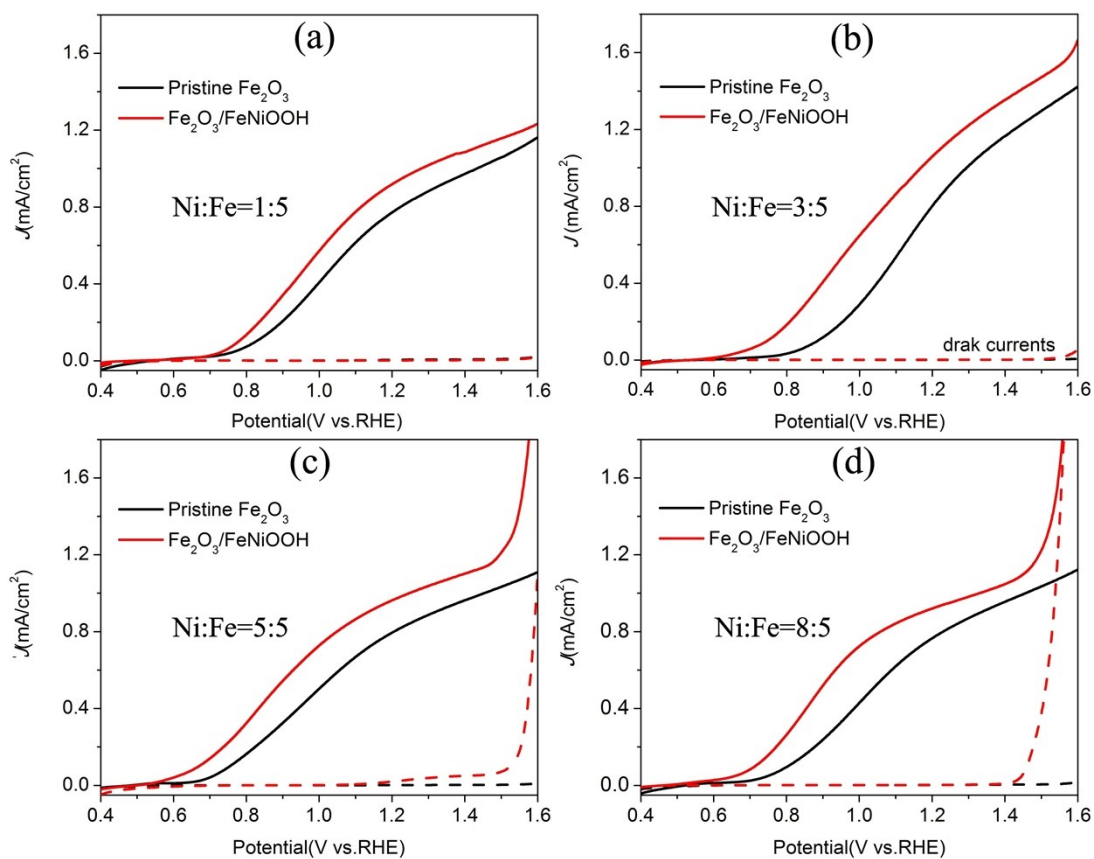

**Fig. S8:**  $J$ - $V$  curves of the pristine and FeNiOOH-decorated hematite photoanodes with various concentrations of the precursors: (a) Ni:Fe=1:5; (b) Ni:Fe=3:5; (c) Ni:Fe=5:5; (d) Ni:Fe=8:5.



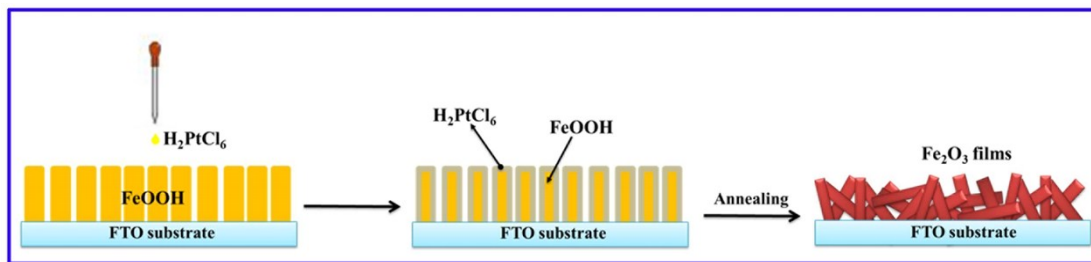

**Fig. S9:** Experimental setup for the decoration of Pt in the hematite photoanode.

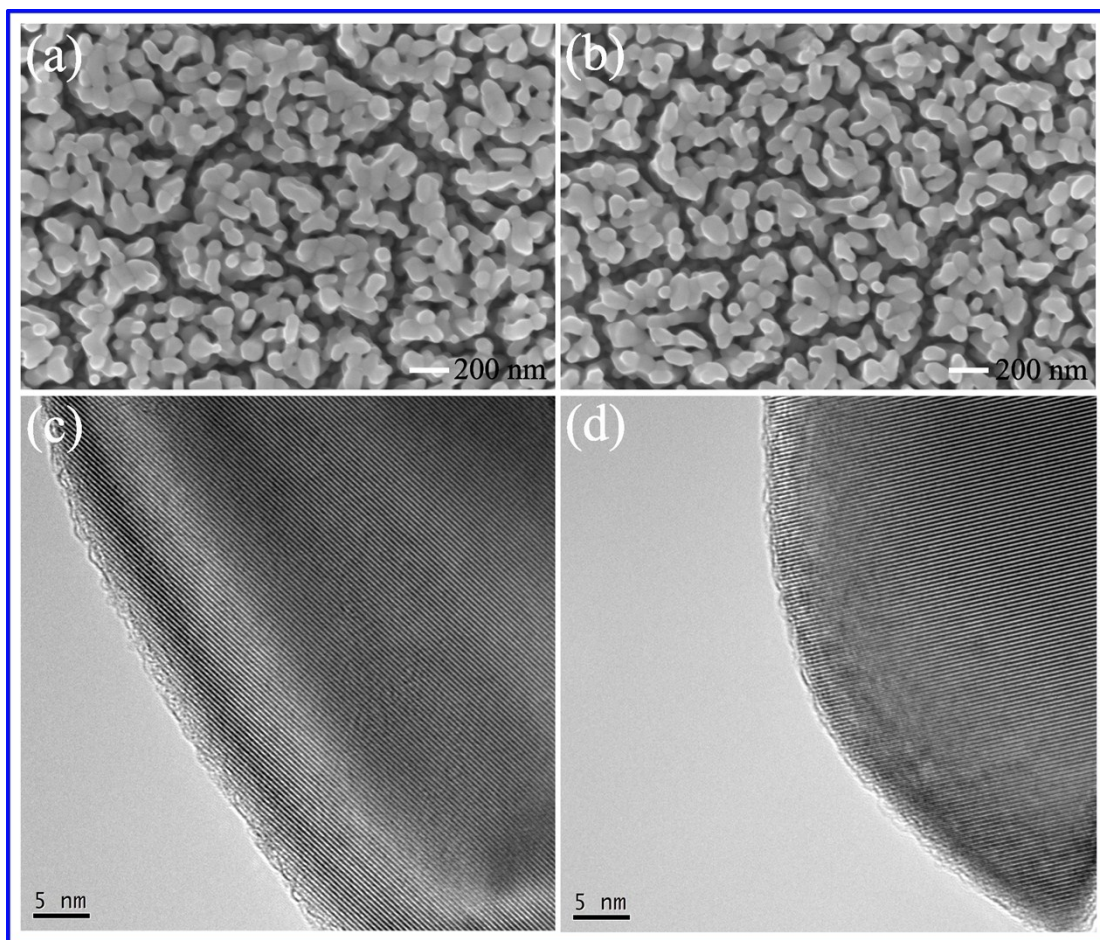

**Fig. S10:** (a) and (c): SEM and HRTEM images of the pristine hematite nanostructures. (b) and (d): SEM and HRTEM images of the Pt-modified hematite nanostructures.

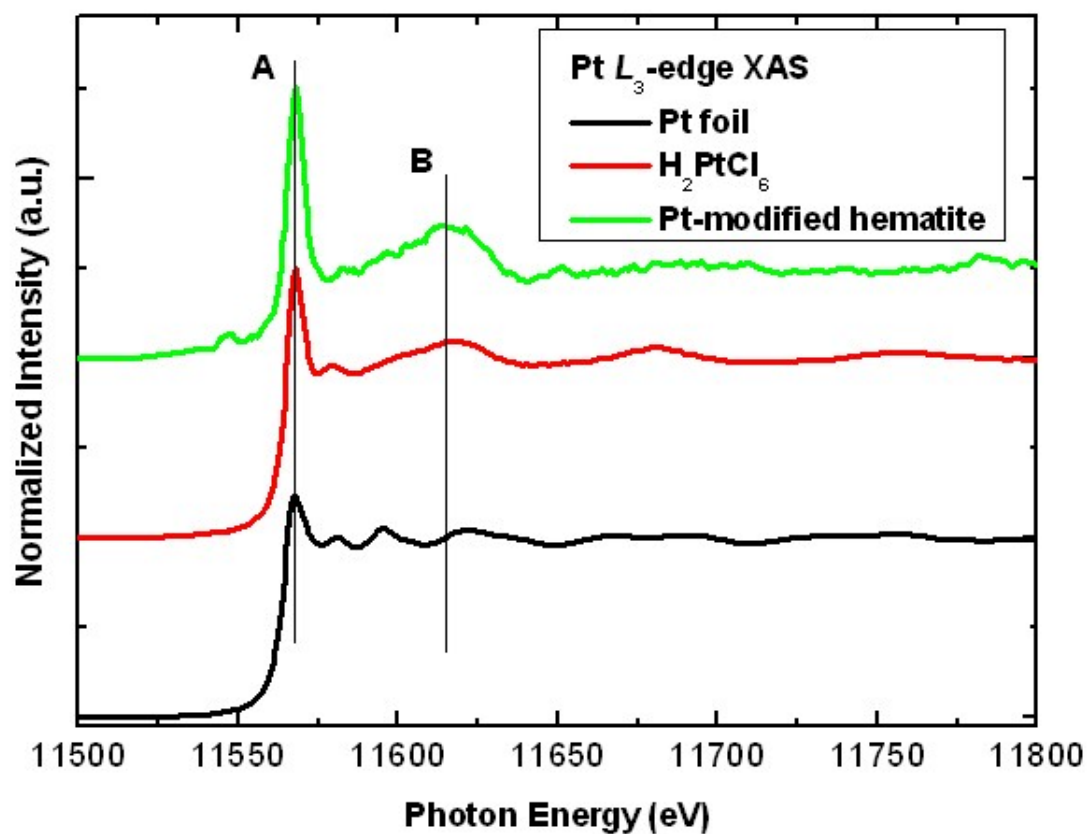

**Fig. S11:** Pt  $L_3$ -edge XAS spectra of the Pt foil,  $H_2PtCl_6$  and Pt-modified hematite nanostructures. The spectrum of the Pt-modified hematite shows a sharp white line peak A and a broad peak B, which is very similar to oxidized Pt such as  $H_2PtCl_6$  or  $PtO_2$  instead of the metallic Pt.

**Table S1:** Parameters of equivalent circuit elements.

|                                            | $R_s$ | $C_{\text{bulk}}$ | $R_{\text{trap}}$ | $C_{\text{trap}}$ | $R_{\text{ct}}$ |
|--------------------------------------------|-------|-------------------|-------------------|-------------------|-----------------|
| Pristine $\text{Fe}_2\text{O}_3$           | 11.26 | 1.376E-5          | 269.5             | 1.603E-4          | 406.5           |
| Pt- $\text{Fe}_2\text{O}_3$                | 15.93 | 8.454E-5          | 59.98             | 4.540E-4          | 205.8           |
| Pt- $\text{Fe}_2\text{O}_3/\text{FeNiOOH}$ | 16.06 | 6.053E-5          | 73.1              | 1.128E-3          | 61.5            |

Illustration of the parameters:  $R_s$  is the series resistances of the PEC cell.  $C_{\text{bulk}}$  is the capacitance of the space charge depletion region at the surface of the electrode. The surface hole trapping process can be reflected by  $R_{\text{trap}}$  and  $C_{\text{trap}}$ ,  $R_{\text{trap}}$  is the resistance in the process of trapping holes by surface states, the amount of active sites in surface states is denoted as  $C_{\text{trap}}$ . The resistance in the process of charge transfer across the interface could be described by  $R_{\text{ct}}$ . (Ref. 37)
